# Supplementary material
Source: Research Square preprint supplement (doi:10.21203/rs.3.rs-9227323/v1)
Supplement: Supplementary file 1 [file 0d1fd85b1252ef00881aa2f0.docx]

**Supplementary Information**

**for**

**Nutrient–Pesticide Coupling Enables Proxy-Based Detection of Neonicotinoids in Complex Water Systems**

Manish Kumar1, 2*, Priyansha Gupta1, Shiwangi Dogra1, Siddhant Dash3, M. Sandoval-Reyes1, Futoshi Kurisu4

*1Escuela de Ingeniería y Ciencias, Tecnologico de Monterrey, Campus Monterey, Monterrey, 64849, Nuevo Leon, Mexico*

*2Sustainability Cluster, School of Advance Engineering, UPES, Dehradun, Uttarakhand 248007, India*

*3Department of Civil Engineering, School of Engineering and Sciences, SRM University AP, Amaravati, 522240, Andhra Pradesh, India*

*4RECWET, the University of Tokyo, Bunkyo-ku, Tokyo, Japan*

***Corresponding author:**

Manish Kumar [ORCID:0000-0002-3351-7298]

Escuela de Ingeniería y Ciencias, Tecnologico de Monterrey, Campus Monterey, Monterrey 64849, Nuevo Leon, Mexico

E-mail address: [manish.env@gmail.com](mailto:manish.env@gmail.com) [manish@tec.mx](mailto:manish@tec.mx)


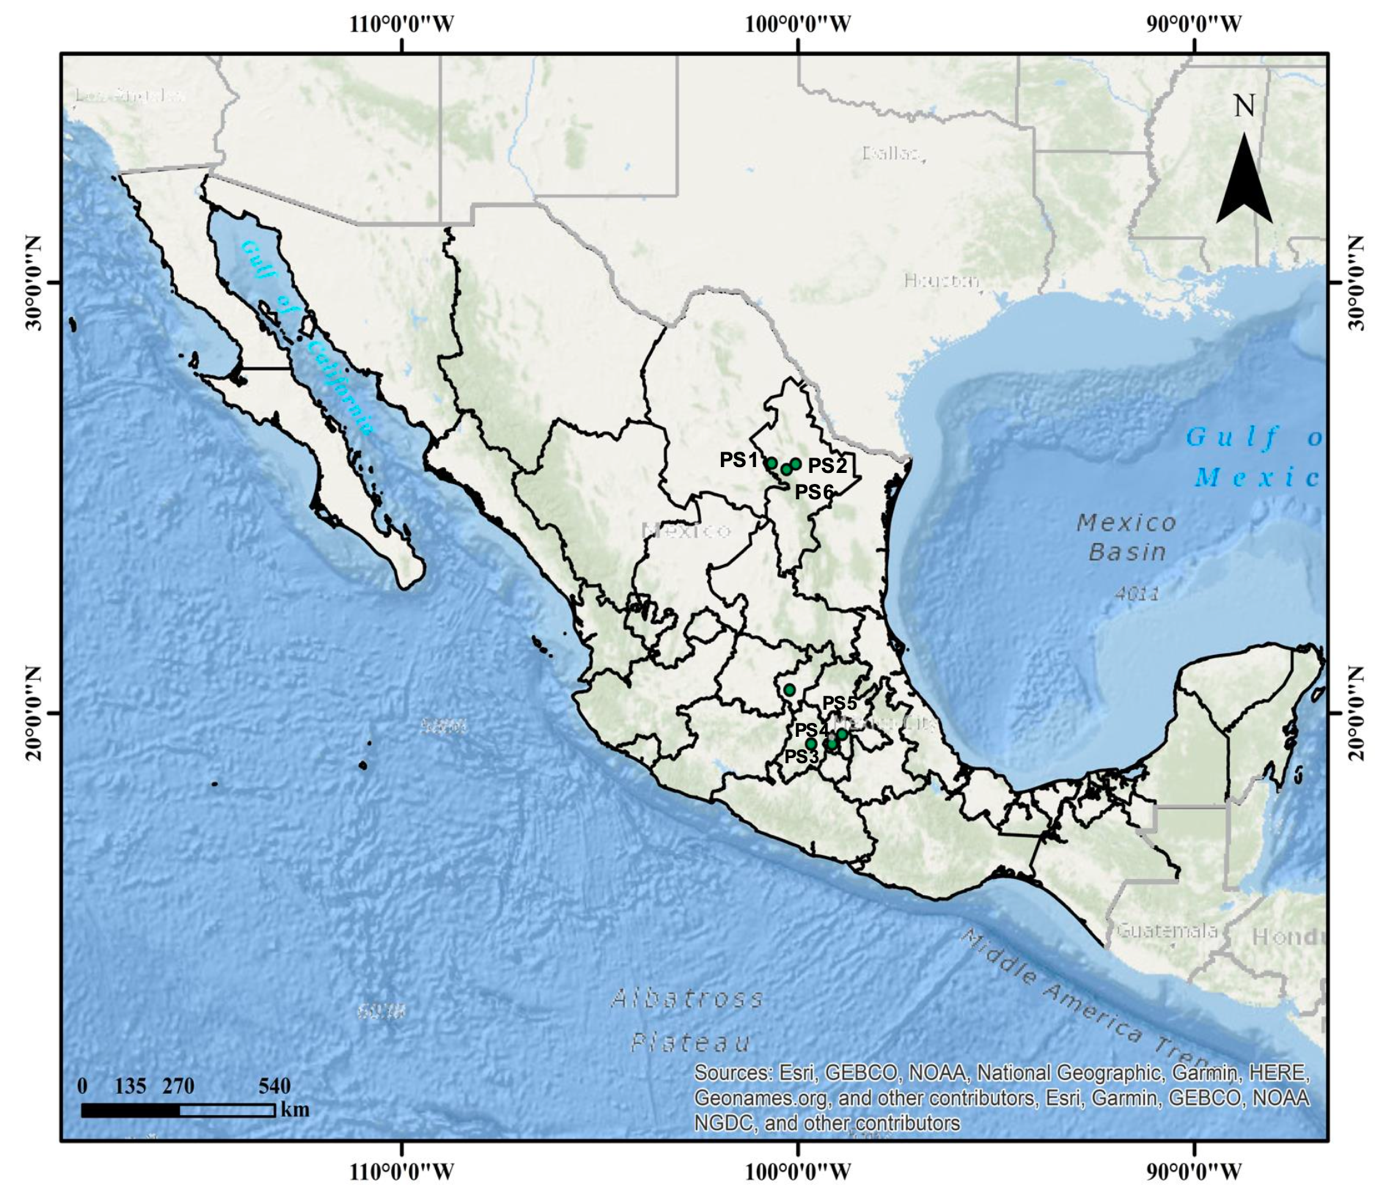


**Fig. S1. Study area and sampling locations across Mexico.** Map showing the geographic distribution of sampling sites (PS1–PS7) across northern and central Mexico, encompassing river systems, wastewater effluents, and groundwater environments. Sites PS1, PS2, and PS6 are located in Nuevo León (Pesquería River and WWTP), PS3–PS5 are situated within the Río Lerma basin in Estado de México, and PS7 represents a groundwater site in Querétaro. The selected locations capture a gradient of agricultural, industrial, municipal, and relatively low-impact hydrogeological settings.


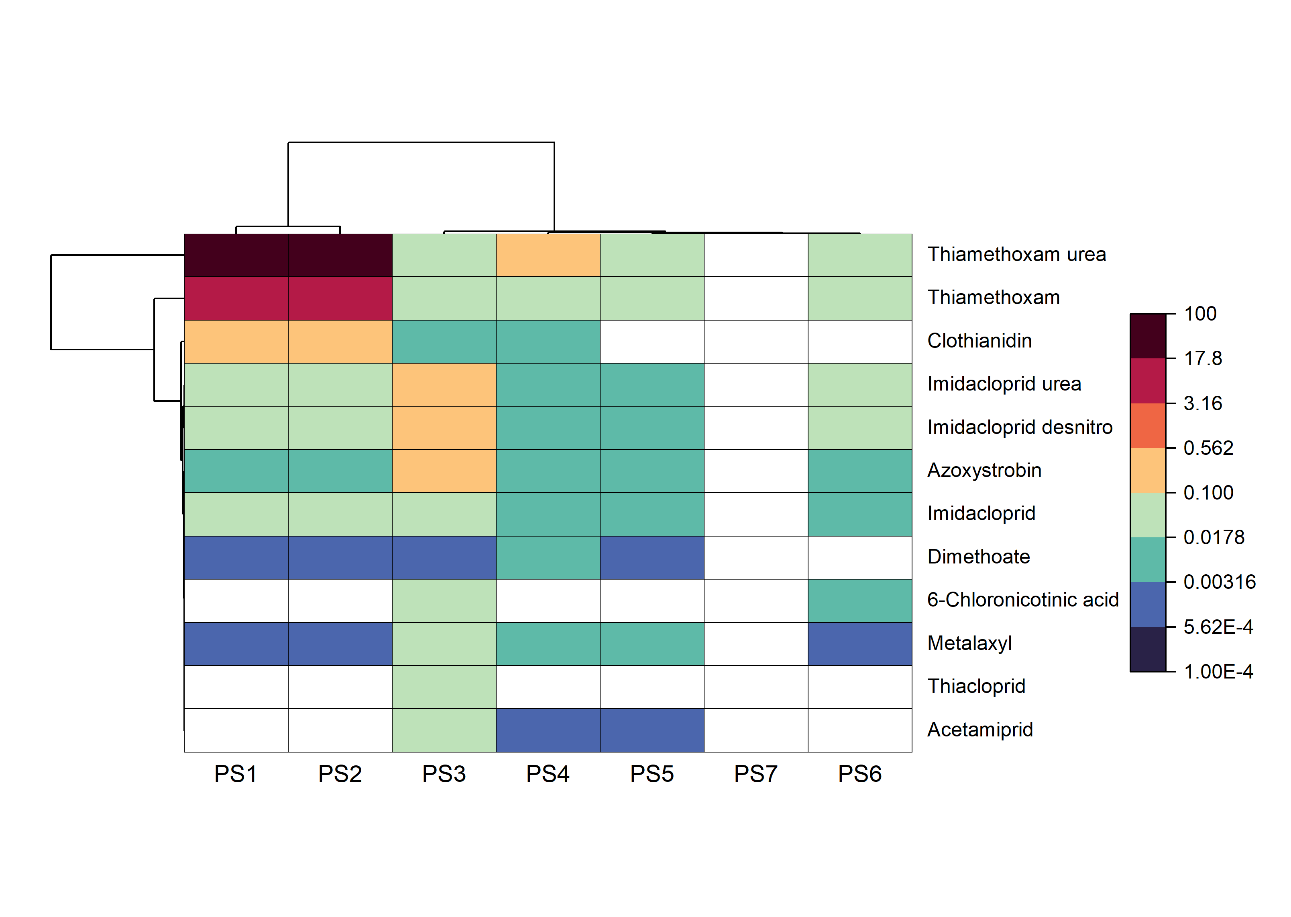


**a)**


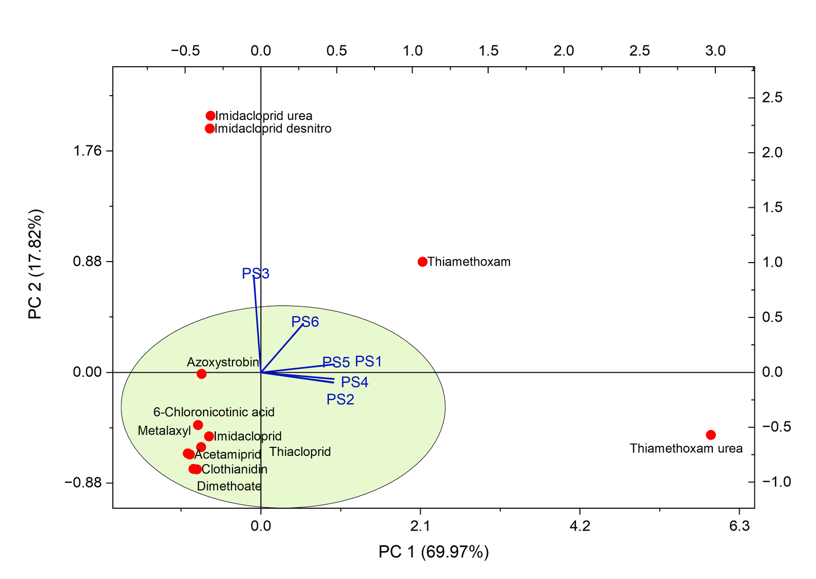


###

**b)**

**Fig. S2 a)** Hierarchical cluster heatmap depicting the occurrence patterns of antibiotics, pharmaceuticals, and personal care products (APPCPs) across sampling locations (PS1–PS7). **b)** Distinct clustering reflects heterogeneous contaminant profiles associated with mixed urban and wastewater inputs, contrasting with the pesticide-dominated patterns.

| Compound | PNEC (ng/L) | RQ_PS1 | RQ_PS2 | RQ_PS3 | RQ_PS4 | RQ_PS5 | RQ_PS6 |
| --- | --- | --- | --- | --- | --- | --- | --- |
| Acetamiprid | 37 | 0 | 0 | 0.00054054 | 2.7027E-05 | 2.7027E-05 | 0 |
| Clothianidin | 10 | 0.0533 | 0.0498 | 0.0005 | 0.0006 | 0 | 0 |
| Dinotefuran | 78 | 0 | 0 | 0 | 0 | 0 | 0 |
| Imidacloprid | 6.8 | 0.00897059 | 0.00764706 | 0.00338235 | 0.00117647 | 0.00088235 | 0.00102941 |
| Imidacloprid desnitro | 6870 | 5.968E-06 | 5.6769E-06 | 5.4585E-05 | 1.1645E-06 | 8.7336E-07 | 2.9112E-06 |
| Imidacloprid olefin | 160 | 0 | 0 | 0 | 0 | 0 | 0 |
| Imidacloprid urea | 14800 | 2.7027E-06 | 2.5676E-06 | 2.6014E-05 | 6.0811E-07 | 3.3784E-07 | 1.5541E-06 |
| Thiacloprid | 10 | 0 | 0 | 0.0022 | 0 | 0 | 0 |
| Thiamethoxam | 40 | 0.1179 | 0.121775 | 0.000675 | 0.001975 | 0.00085 | 0.002425 |
| Thiamethoxam urea | 40 | 0.516575 | 0.560425 | 0.0014 | 0.00735 | 0.00145 | 0.000825 |
| 6-Chloronicotinic acid | 42200 | 0 | 0 | 5.6872E-07 | 0 | 0 | 3.0806E-07 |
| 6-Chloronicotinic aldehyde | 42200 | 0 | 0 | 0 | 0 | 0 | 0 |
| 6-Chloro-N-methylnicotinamide | 200 | 0 | 0 | 0 | 0 | 0 | 0 |
| Azoxystrobin | 200 | 0.00003 | 0.000025 | 0.00055 | 0.000025 | 0.000025 | 0.000015 |
| Picoxystrobin | 72 | 0 | 0 | 0 | 0 | 0 | 0 |
| Pyraclostrobin | 200 | 0 | 0 | 0 | 0 | 0 | 0 |
| Trifloxystrobin | 270 | 0 | 0 | 0 | 0 | 0 | 0 |
| Metalaxyl | 100000 | 0.00000001 | 0.00000002 | 0.00000025 | 0.00000008 | 0.00000004 | 0.00000001 |
| Dimethoate | 70 | 1.4286E-05 | 1.4286E-05 | 2.8571E-05 | 5.7143E-05 | 2.8571E-05 | 0 |
| Indoxacarb | 420 | 0 | 0 | 0 | 0 | 0 | 0 |
| Sulfoxaflor | 7970 | 0 | 0 | 0 | 0 | 0 | 0 |

**Table S1. Ecological risk characterization of detected pesticides based on Predicted No-Effect Concentrations (PNECs).**

### **Table S2. Ecological risk characterization of detected APPCPs based on PNECs values.**

| Compound | PNEC (ng/L) | RQ_PS1 | RQ_PS2 | RQ_PS3 | RQ_PS4 | RQ_PS5 | RQ_PS6 | RQ_PS7 |
| --- | --- | --- | --- | --- | --- | --- | --- | --- |
| Ampicillin | 250 | 0 | 0 | 0 | 0 | 0 | 0 | 0 |
| Azithromycin | 9.4 | 0.0013883 | 0.00039362 | 0.01171383 | 0.00785532 | 0.00620638 | 0.00040638 | 0 |
| Ciprofloxacin | 64 | 0.00059578 | 0.00085359 | 0.00067344 | 0 | 0.00172156 | 0.00175359 | 0 |
| Clarithromycin | 120 | 0.00011042 | 3.0167E-05 | 0.000956 | 0.00063933 | 0.00047383 | 3.1833E-05 | 1.6417E-06 |
| Clinafloxacin | 64 | 0 | 0 | 0 | 0 | 0 | 0 | 0 |
| Erythromycin | 1000 | 0.00000355 | 0.00000202 | 0.00002092 | 0.00000764 | 0.00000654 | 0 | 0 |
| Lincomycin | 1000 | 0.0000091 | 0.00000558 | 0.00013301 | 0.00003741 | 0.00013136 | 0.00001556 | 0 |
| Ofloxacin | 120 | 0.00115842 | 0.00084325 | 0.00010633 | 3.7167E-05 | 0.00192958 | 0.00083367 | 5.2333E-05 |
| Sarafloxacin | 120 | 0 | 0 | 0 | 0 | 0 | 9.4167E-06 | 0 |
| Sulfachlorpyridazine | 590 | 0 | 0 | 4.2153E-05 | 0 | 0 | 0 | 0 |
| Sulfadiazine | 590 | 0 | 4.9661E-06 | 7.0661E-05 | 1.9339E-05 | 0.00014522 | 1.2424E-05 | 0 |
| Sulfamerazine | 590 | 0 | 5.678E-06 | 0 | 0 | 0 | 0 | 0 |
| Sulfamethazine | 590 | 0 | 1.178E-05 | 2.7186E-05 | 2.1915E-05 | 0 | 3.4746E-06 | 0 |
| Sulfamethiazole | 590 | 0 | 0 | 0 | 0 | 9.5593E-06 | 0 | 0 |
| Sulfamethoxazole | 590 | 0.00031888 | 0.0016358 | 0.00278247 | 0.000815 | 0.00058054 | 0.01815307 | 0 |
| Sulfanilamide | 590 | 7.1254E-05 | 0.00034149 | 0.00027656 | 0.00019273 | 6.9712E-05 | 0.00032773 | 0.0002488 |
| Trimethoprim | 1758000 | 3.4317E-08 | 4.335E-08 | 4.0046E-09 | 2.4061E-09 | 2.6974E-08 | 2.7675E-07 | 0 |
| Acetaminophen | 100000 | 5.95E-08 | 0 | 3.49E-07 | 4.48E-08 | 0 | 6.75E-08 | 0 |
| Caffeine | 500000 | 1.4001E-06 | 6.928E-07 | 3.4857E-06 | 4.2748E-07 | 3.202E-08 | 6.534E-08 | 0 |
| Carbamazepine | 500000 | 1.9324E-07 | 2.0368E-07 | 4.805E-07 | 6.392E-08 | 1.293E-07 | 6.476E-08 | 0 |
| Cotinine | 100000 | 1.4117E-06 | 8.299E-07 | 1.0644E-05 | 3.3E-08 | 1.668E-06 | 1.09E-08 | 4.97E-09 |
| Dehydronifedipine | 100000 | 8.98E-09 | 8.69E-09 | 0 | 0 | 0 | 3.7E-08 | 0 |
| Diphenhydramine | 100000 | 2.25E-08 | 8.97E-09 | 4.25E-09 | 5.21E-09 | 2.2E-08 | 2.66E-07 | 6.55E-08 |
| Phenazone | 100000 | 3.781E-07 | 1.2502E-06 | 1.325E-07 | 4.81E-08 | 2.091E-07 | 5.369E-07 | 0 |
| Sucralose | 440000 | 8.1188E-05 | 7.2571E-05 | 3.487E-05 | 2.9141E-05 | 2.4297E-05 | 6.9507E-05 | 0 |
| Thiabendazole | 1000 | 0.00001165 | 0.00001496 | 0.00002095 | 0.00010074 | 0.00000517 | 0.00000384 | 1.52E-07 |
